# Supplementary material for: Machine Learning Modeling to Predict Atrial Fibrillation Detection in Embolic Stroke of Undetermined Source Patients
Source: MDPI journal article supplement (doi:10.3390/jpm14050534), 2024-05-16
Supplement: s1 [file s1]

## Supplementary Material

Figure S1: Feature Importance of Best-performing Random Forest Model

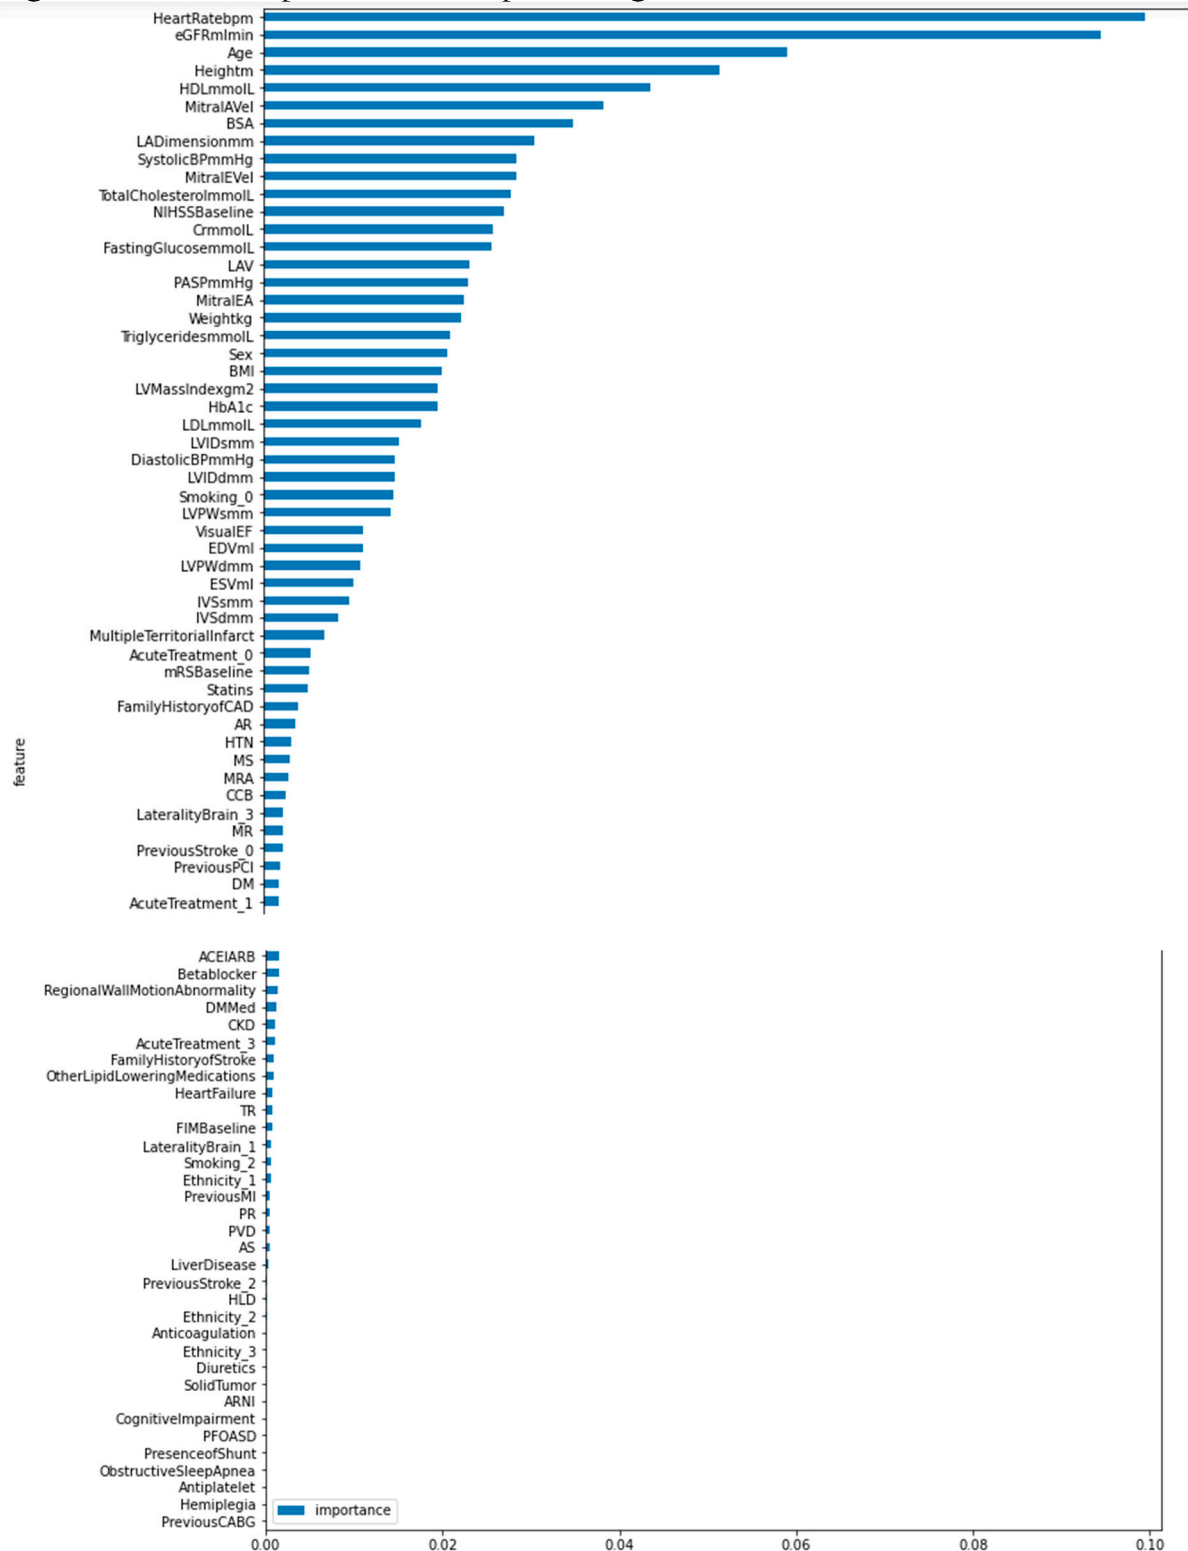

Abbreviations: abbreviations of all features are found in Supplementary Table 5.

Figure S2: Beeswarm Plot of Best-performing SVM Model (top 20 features displayed)

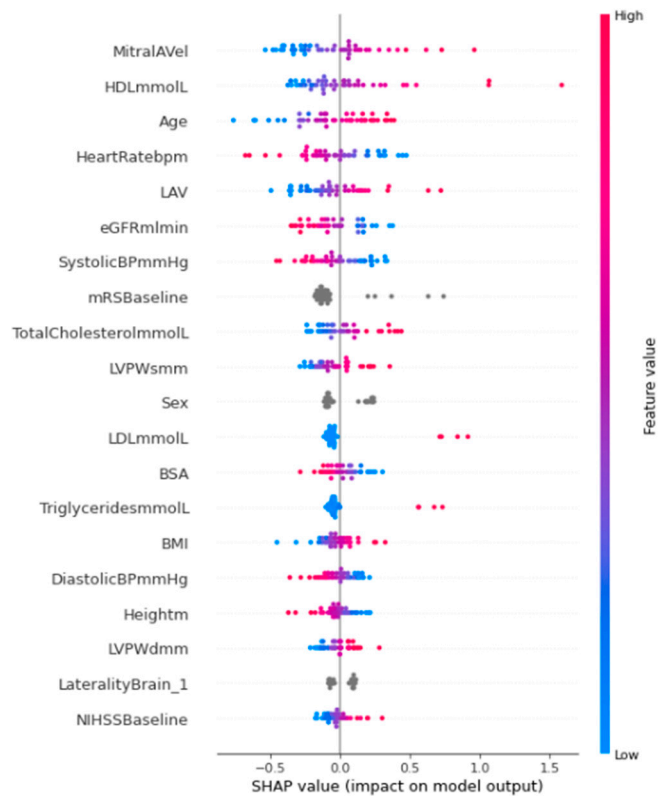

Abbreviations: SVM support vector machine. Abbreviations of all features are found in Supplementary Table 4.

Figure S3: SHAP Global Importance/Explanations: Force Plot with Best-performing SVM Model

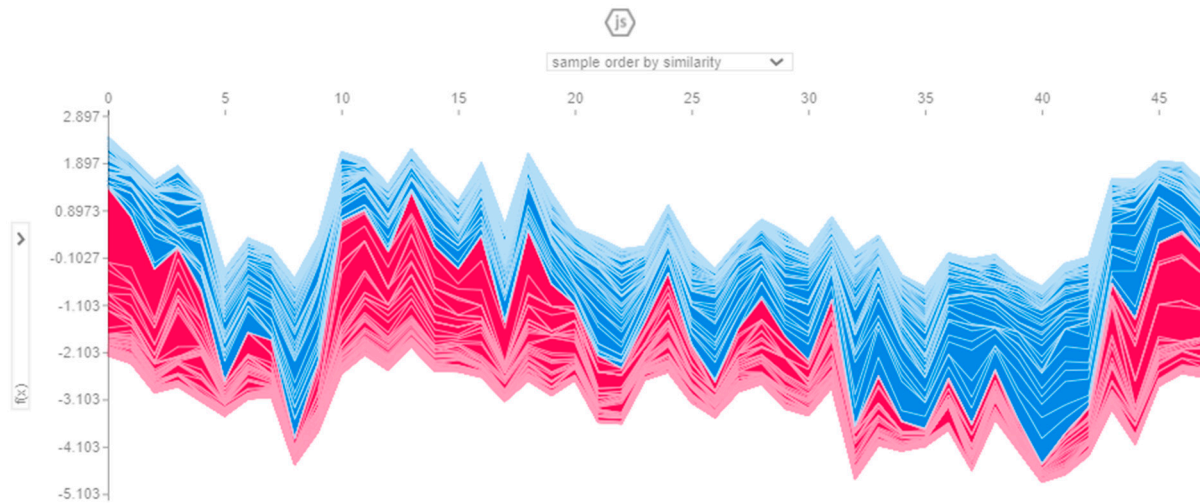

Abbreviations: SHapley Additive exPlanations, SVM support vector machine.

Figure S4: SHAP Local Importance/Explanations: Force Plot with Best-performing SVM Model for single patient (index patient)

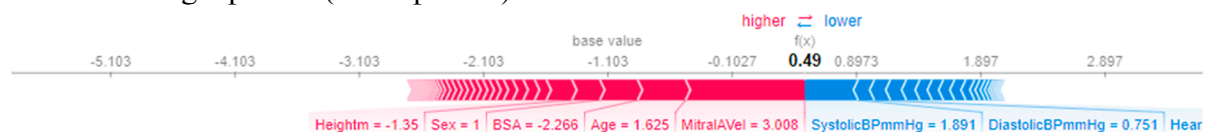

Abbreviations: SHapley Additive exPlanations, SVM support vector machine. Abbreviations of all features are found in Supplementary Table 4.

Table S1: Set of Hyperparameters Tuned using Grid Search in Machine Learning Models

| Model         | Hyperparameters Tuned using Grid Search                                                                                                                                                                                              |
|---------------|--------------------------------------------------------------------------------------------------------------------------------------------------------------------------------------------------------------------------------------|
| SVM           | misclassification penalty parameter C, gamma, and kernel function.                                                                                                                                                                   |
| Random Forest | number of trees in the random forest, maximum depth of a tree, minimum number of samples required for each split, minimum number of samples required for each leaf node, and whether bootstrap samples are used when building trees. |
| XGBoost       | learning rate, L1 regularization parameter, minimum loss reduction required for each leaf node, maximum tree depth for the base classifiers, minimum weight needed to create a new node, and the number of boosting iterations.      |
| MLP           | number of neurons in the hidden layer, activation function used for the hidden layer, the L2 regularization parameter, learning rate, and maximum number of iterations.                                                              |

Abbreviations: SVM support vector machine, XGBoost eXtreme Gradient Boosting, MLP multilayer perceptron

Table S2: List of Features included in ML Models and their Abbreviations:

| Clinical parameters and biomarkers            |                       | Echocardiography parameters                   |                                |
|-----------------------------------------------|-----------------------|-----------------------------------------------|--------------------------------|
| Feature                                       | Abbreviation used     | Feature                                       | Abbreviation used              |
| Age                                           | Age                   | Cardiac shunt                                 | PresenceofShunt                |
| Sex                                           | Sex                   | Peak mitral E-wave velocity                   | MitralEVel                     |
| Body surface area                             | BSA                   | Peak mitral A-wave velocity                   | MitralAVel                     |
| Ethnicity                                     | Ethnicity             | Mitral E/A ratio                              | MitralEA                       |
| Height                                        | Heightm               | PASP                                          | PASPmmHg                       |
| Weight                                        | Weightkg              | LVID at end diastole                          | LVIDdmm                        |
| Systolic blood pressure                       | SystolicBPmmHg        | LVID at end systole                           | LVIDsmm                        |
| Diastolic blood pressure                      | DiastolicBPmmHg       | End-diastolic volume                          | EDVml                          |
| Admitting heart rate                          | HeartRatebpm          | End-systolic volume                           | ESVml                          |
| Family history of coronary artery disease     | FamilyHistoryofCAD    | Ejection fraction                             | VisualEF                       |
| Family history of stroke                      | FamilyHistoryofStroke | Interventricular septal thickness in diastole | IVSdmm                         |
| Smoking                                       | Smoking               | Interventricular septal thickness in systole  | IVSsmm                         |
| Hypertension                                  | HTN                   | LVPWd                                         | LVPWdmm                        |
| Hyperlipidemia                                | HLD                   | LVPWs                                         | LVPWsmm                        |
| Diabetes mellitus status                      | DM                    | Left atrial diameter                          | LADimensionmm                  |
| Previous myocardial infarction                | PreviousMI            | Left atrial volume                            | LAV                            |
| Previous percutaneous coronary intervention   | PreviousPCI           | Left ventricular mass index                   | LVMassIndexgm2                 |
| Previous coronary artery bypass graft surgery | PreviousCABG          | PFO or ASD                                    | PFOASD                         |
| Previous stroke                               | PreviousStroke        | Mitral regurgitation                          | MR                             |
| Heart failure                                 | HeartFailure          | Mitral stenosis                               | MS                             |
| Peripheral vascular disease                   | PVD                   | Aortic regurgitation                          | AR                             |
| Cognitive impairment                          | CognitiveImpairment   | Aortic stenosis                               | AS                             |
| Presence of liver disease                     | LiverDisease          | Tricuspid regurgitation                       | TR                             |
| Hemiplegia                                    | Hemiplegia            | Pulmonary regurgitation                       | PR                             |
| Obstructive sleep apnea                       | ObstructiveSleepApnea | Regional wall motion abnormality              | RegionalWallMotion-Abnormality |
| Chronic kidney disease                        | CKD                   |                                               |                                |

|                                               |                                   |  |  |
|-----------------------------------------------|-----------------------------------|--|--|
| Solid tumor present                           | SolidTumor                        |  |  |
| <b>Medications</b>                            |                                   |  |  |
| Beta blocker use                              | Betablocker                       |  |  |
| ACEI or ARB use                               | ACEIARB                           |  |  |
| Angiotensin Receptor<br>Neprilysin inhibitor  | ARNI                              |  |  |
| Mineralocorticoid<br>receptor antagonist      | MRA                               |  |  |
| Diabetic medication use                       | DMMed                             |  |  |
| Diuretics                                     | Diuretics                         |  |  |
| Calcium channel blocker                       | CCB                               |  |  |
| Statin use                                    | Statins                           |  |  |
| On non-statin lipid-<br>lowering medications  | OtherLipidLoweringMed<br>ications |  |  |
| Antiplatelet                                  | Antiplatelet                      |  |  |
| Anticoagulation                               | Anticoagulation                   |  |  |
| <b>Stroke parameters</b>                      |                                   |  |  |
| Laterality of stroke                          | LateralityBrain                   |  |  |
| Multiple territorial<br>infarct               | MultipleTerritorialInfarct        |  |  |
| Acute treatment for<br>stroke                 | AcuteTreatment                    |  |  |
| Functional Independent<br>Measure at baseline | FIMBaseline                       |  |  |
| Modified Rankin Scale<br>at baseline          | mRSBaseline                       |  |  |
| NIHSS at baseline                             | NIHSSBaseline                     |  |  |
| ASPECTS at baseline                           | ASPECTSBaseline                   |  |  |
| Total cholesterol                             | TotalCholesterolmmolL             |  |  |
| LDL-C                                         | LDLmmolL                          |  |  |
| HDL-C                                         | HDLmmolL                          |  |  |
| Triglycerides                                 | TriglyceridesmmolL                |  |  |
| HbA1c                                         | HbA1c                             |  |  |
| Fasting glucose                               | FastingGlucosemmolL               |  |  |
| Creatinine                                    | CrmmolL                           |  |  |
| eGFR                                          | eGFRmlmin                         |  |  |

Abbreviations: ACEI angiotensin-converting enzyme inhibitor, ARB angiotensin receptor blocker, ASPECTS Alberta Stroke Program Early CT Score, NIHSS National Institutes of Health Stroke Scale, LDL-C low-density lipoprotein cholesterol, HDL-C high-density lipoprotein cholesterol, HbA1c hemoglobin A1c, eGFR estimated glomerular filtration rate, PASP pulmonary arterial systolic pressure, LVID left ventricular internal diameter, LVPWd left ventricular posterior wall thickness end-diastole, LVPWs left ventricular posterior wall thickness end-systole, PFO patent foramen ovale, ASD atrial septal defect
